# Supplementary material for: Resolving physical interactions between bacteria and nanotopographies with focused ion beam scanning electron microscopy
Source: iScience. 2021 Jul 7;24(7):102818. doi: 10.1016/j.isci.2021.102818 (PMC8319809; doi:10.1016/j.isci.2021.102818)
Supplement: Document S1. Figures S1–S6 [file mmc1.pdf]

## **Supplemental information**

### **Resolving physical interactions between bacteria and nanotopographies with focused ion beam scanning electron microscopy**

**Joshua Jenkins, Mohd I. Ishak, Marcus Eales, Ali Gholinia, Satishkumar Kulkarni, Thomas F. Keller, Paul W. May, Angela H. Nobbs, and Bo Su**

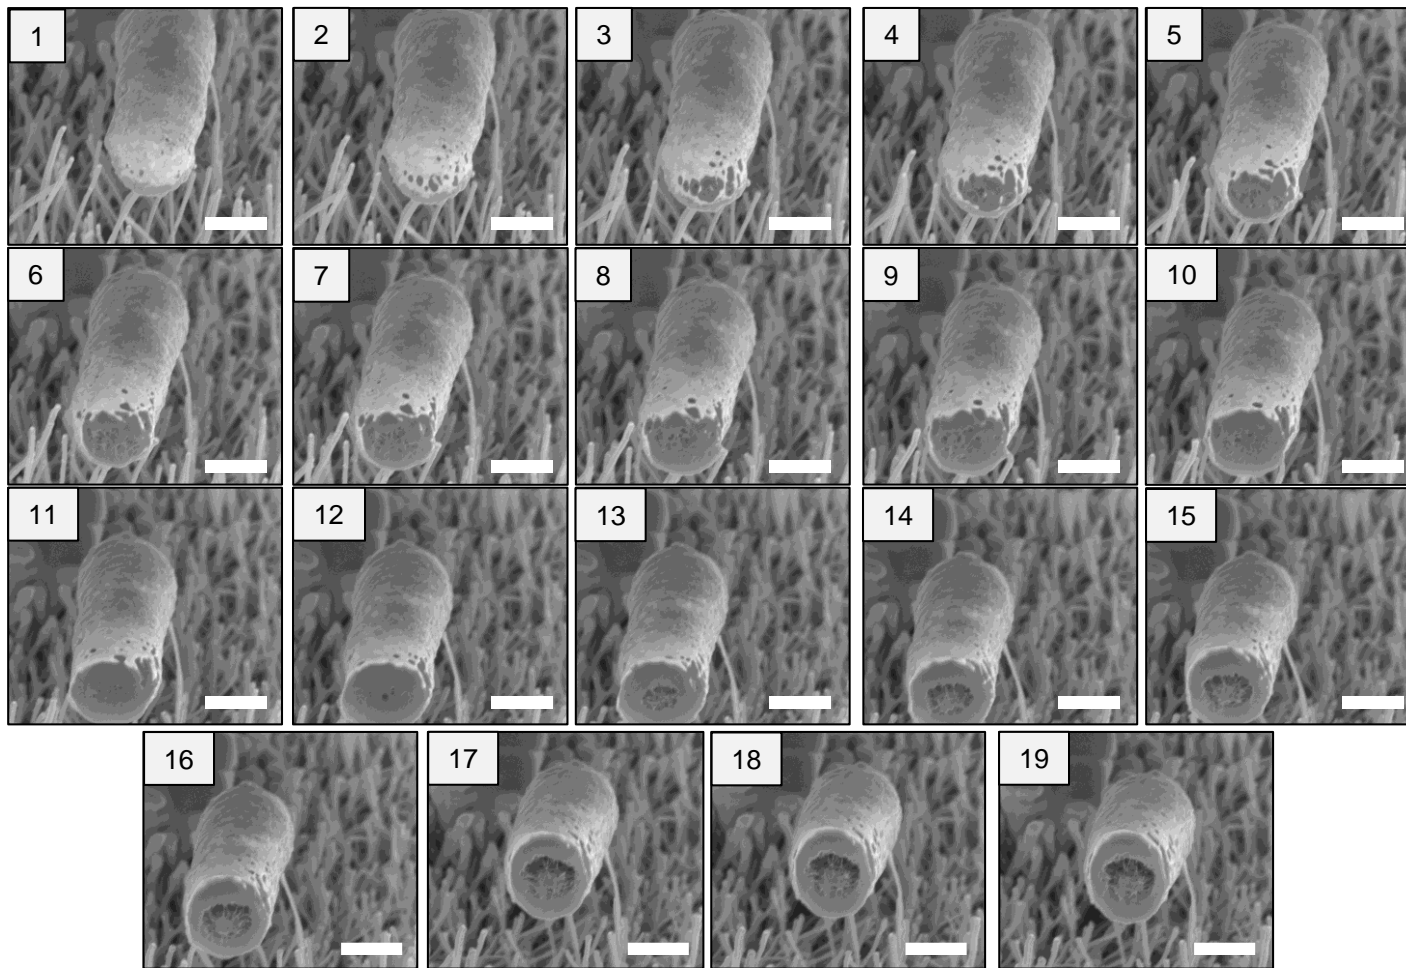

**Supplementary Figure 1. Slice and view focused ion beam milling of *E. coli* without platinum deposition.** FIB-SEM was used to generate sequential 30 nm cross sections through *E. coli* without a protective platinum coating. The milling interface of 19 serial sections is shown. Scale bar: 500 nm. Related to Figure 2.

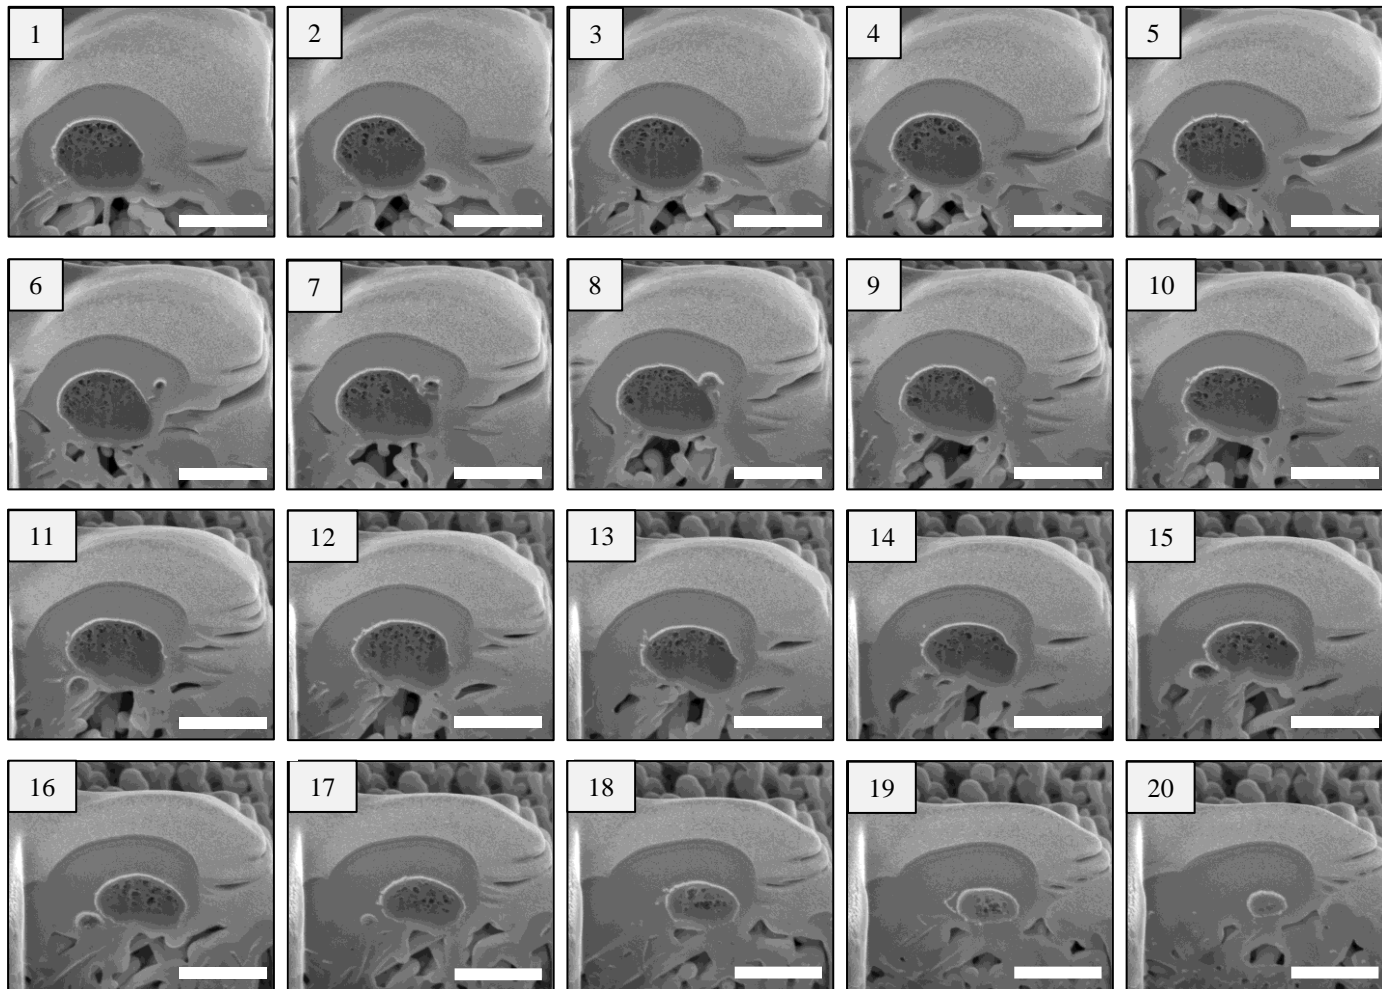

**Supplementary Figure 2. Slice and view focused ion beam milling of *E. coli* with platinum deposition.** FIB-SEM was used to generate sequential 30 nm cross sections through *E. coli* with a protective platinum coating. The milling interface of 20 serial sections is shown. Scale bar: 500 nm. Related to Figure 2.

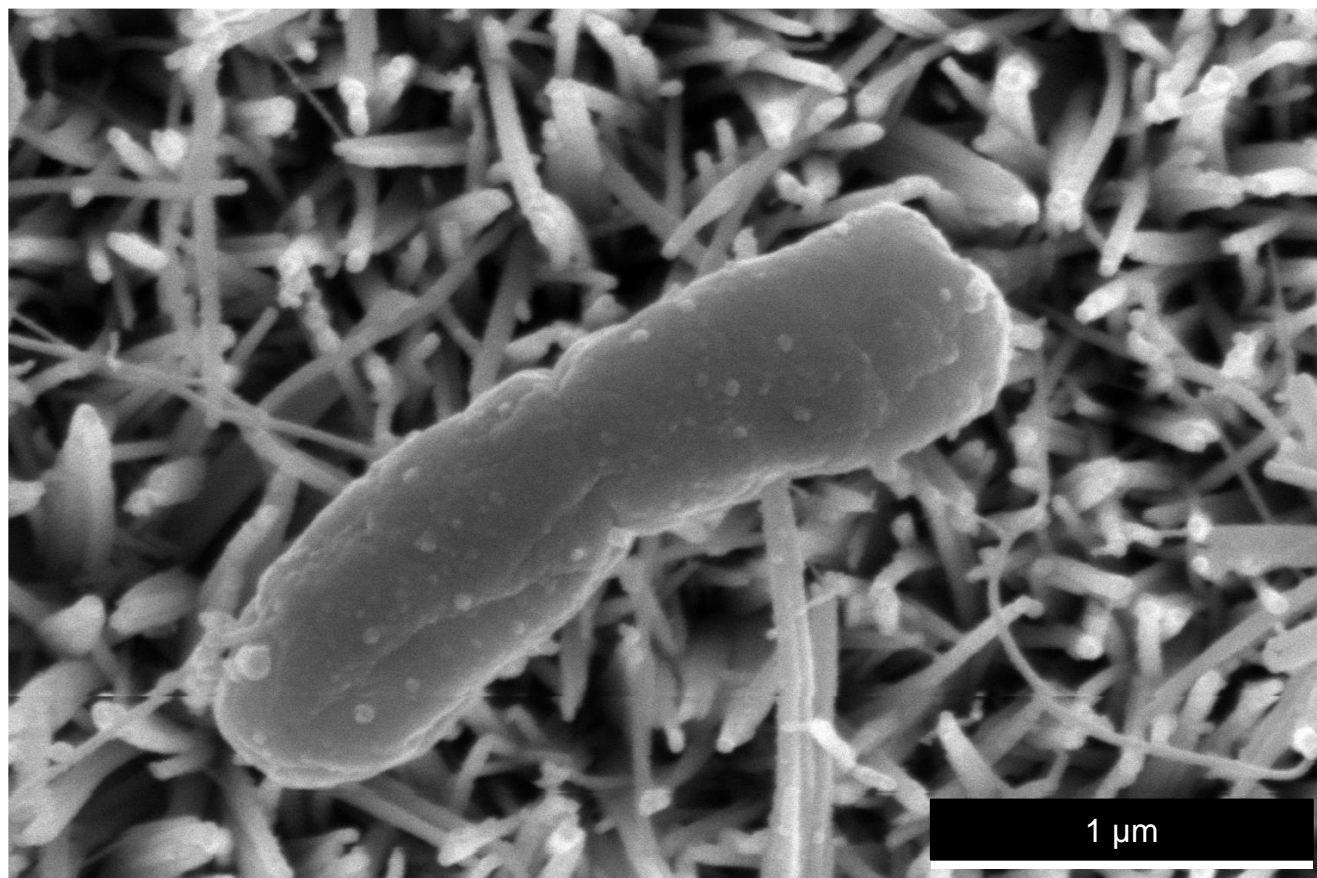

**Supplementary Figure 3. *E. coli* envelope deformation induced by AH-NS-Medium surface.** No evidence of envelope penetration was observed for *E. coli* on AH-NS-Medium surfaces. However, many *E. coli* cells displayed envelope deformation at the point of nanostructure contact, as represented in this micrograph. Related to Figures 3, 4 and 5.

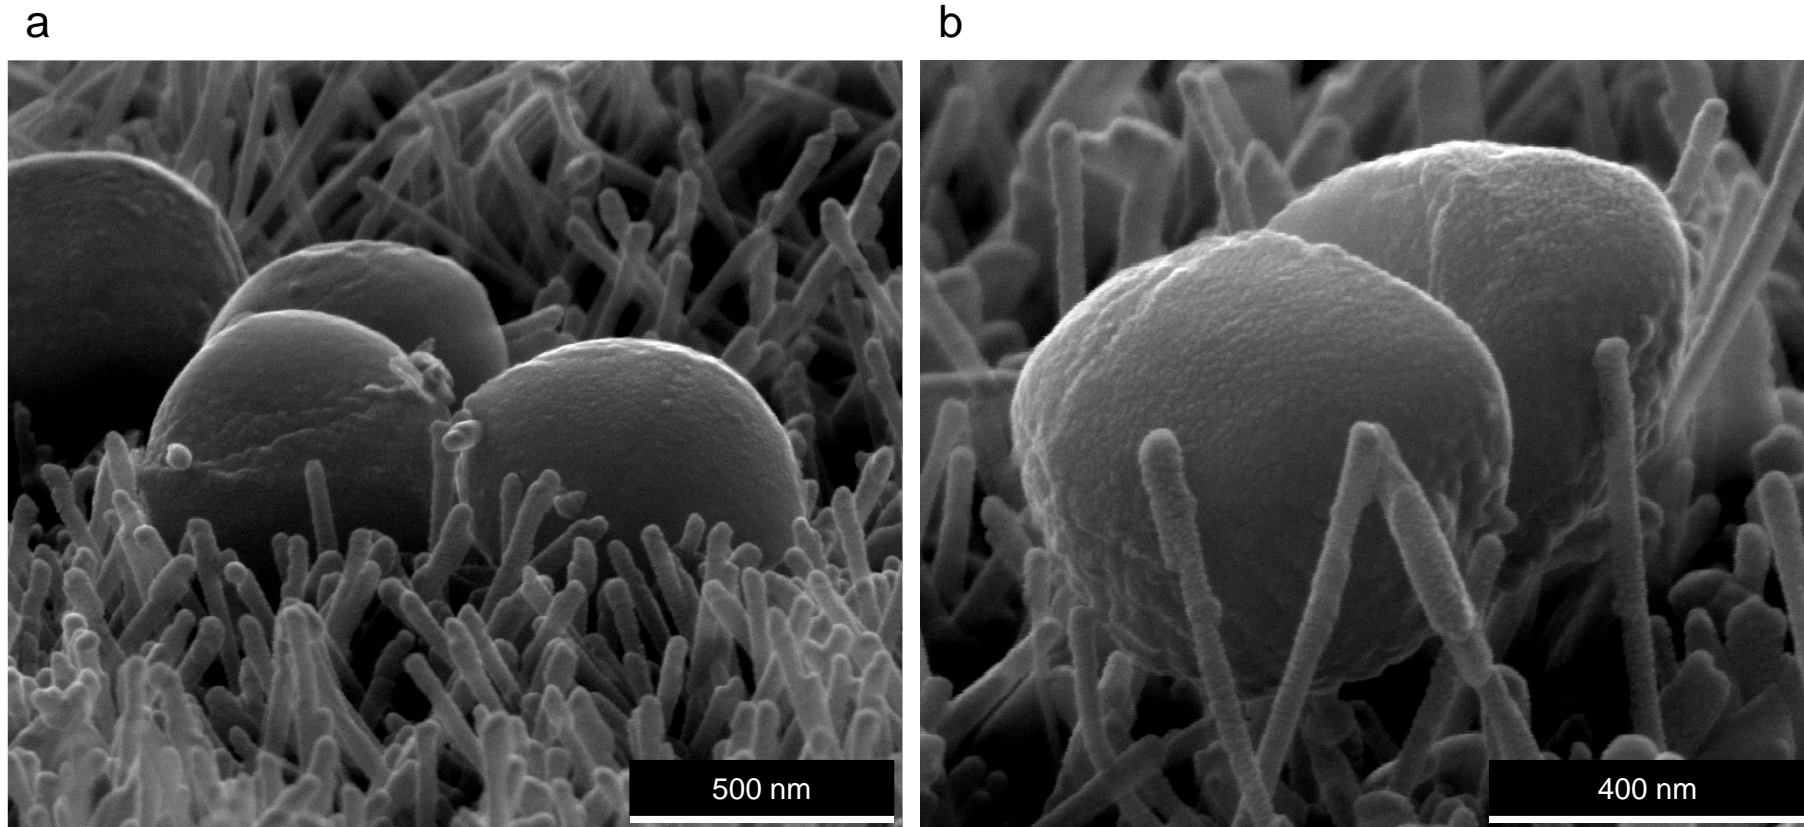

**Supplementary Figure 4. *S. aureus* cell impedance induced by TO-NS-Short surface.** Representative scanning electron micrographs of *S. aureus* cells impeded by TiO<sub>2</sub> nanostructures on TO-NS-Short surfaces (a-b). The random growth direction of TiO<sub>2</sub> nanostructures on TO-NS-Short surfaces generates variation in nanostructure density across the surface, meaning that some *S. aureus* cells adhere between nanostructures that are spaced greater than 500 nm apart. Related to Figure 6.

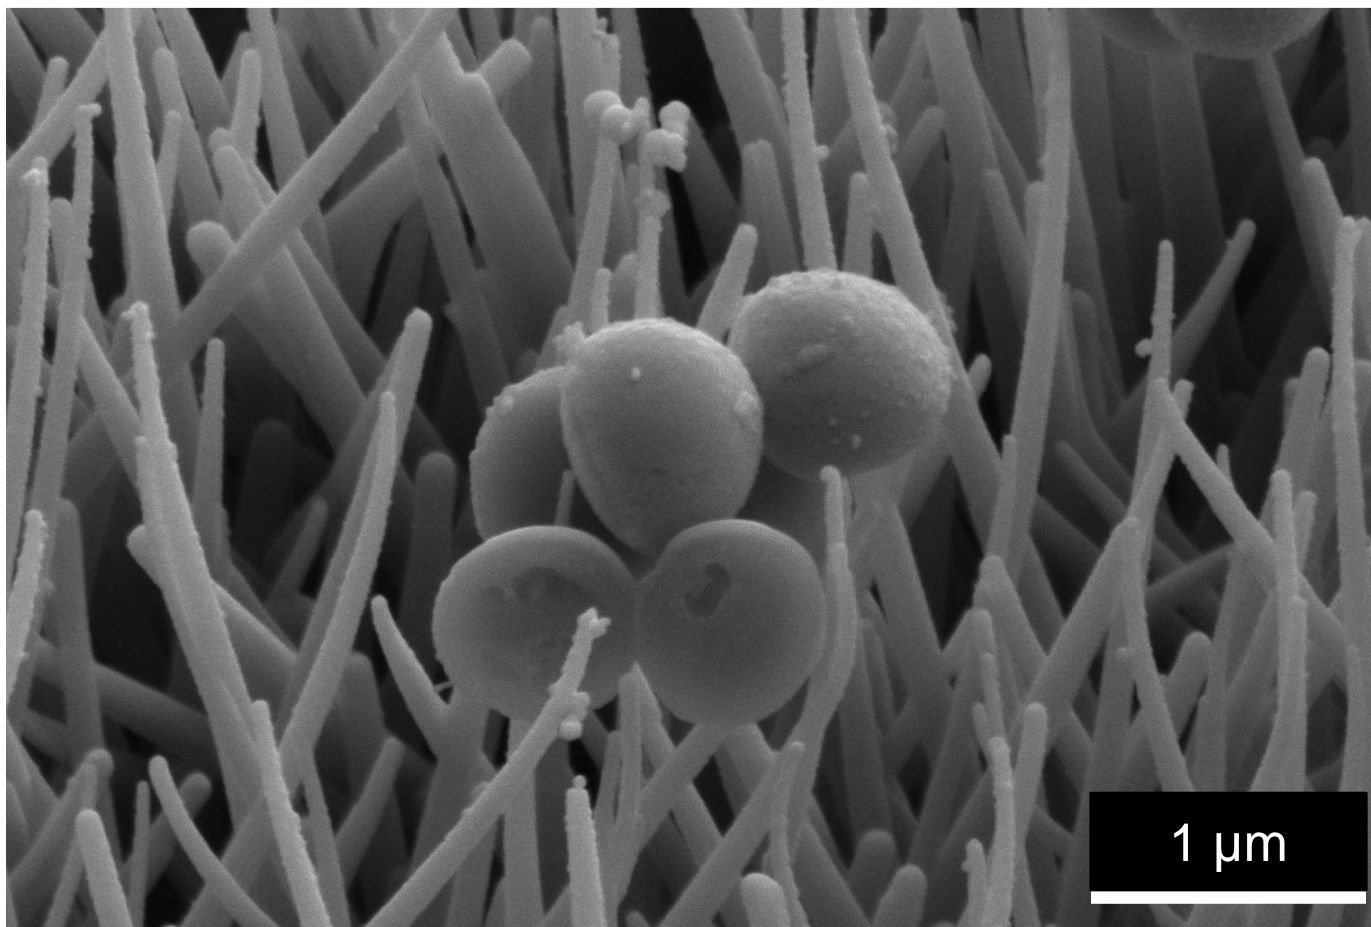

**Supplementary Figure 5. Evidence for *S. aureus* cell impedance induced by TO-NS-Long surface.** Representative scanning electron micrographs of *S. aureus* impeded by TiO<sub>2</sub> nanostructures on TO-NS-Long surfaces. Cross sections through *S. aureus* cells show no evidence of envelope deformation or penetration, but clearly show that *S. aureus* cells have adhered between the nanostructures. Related to Figures 8-9.

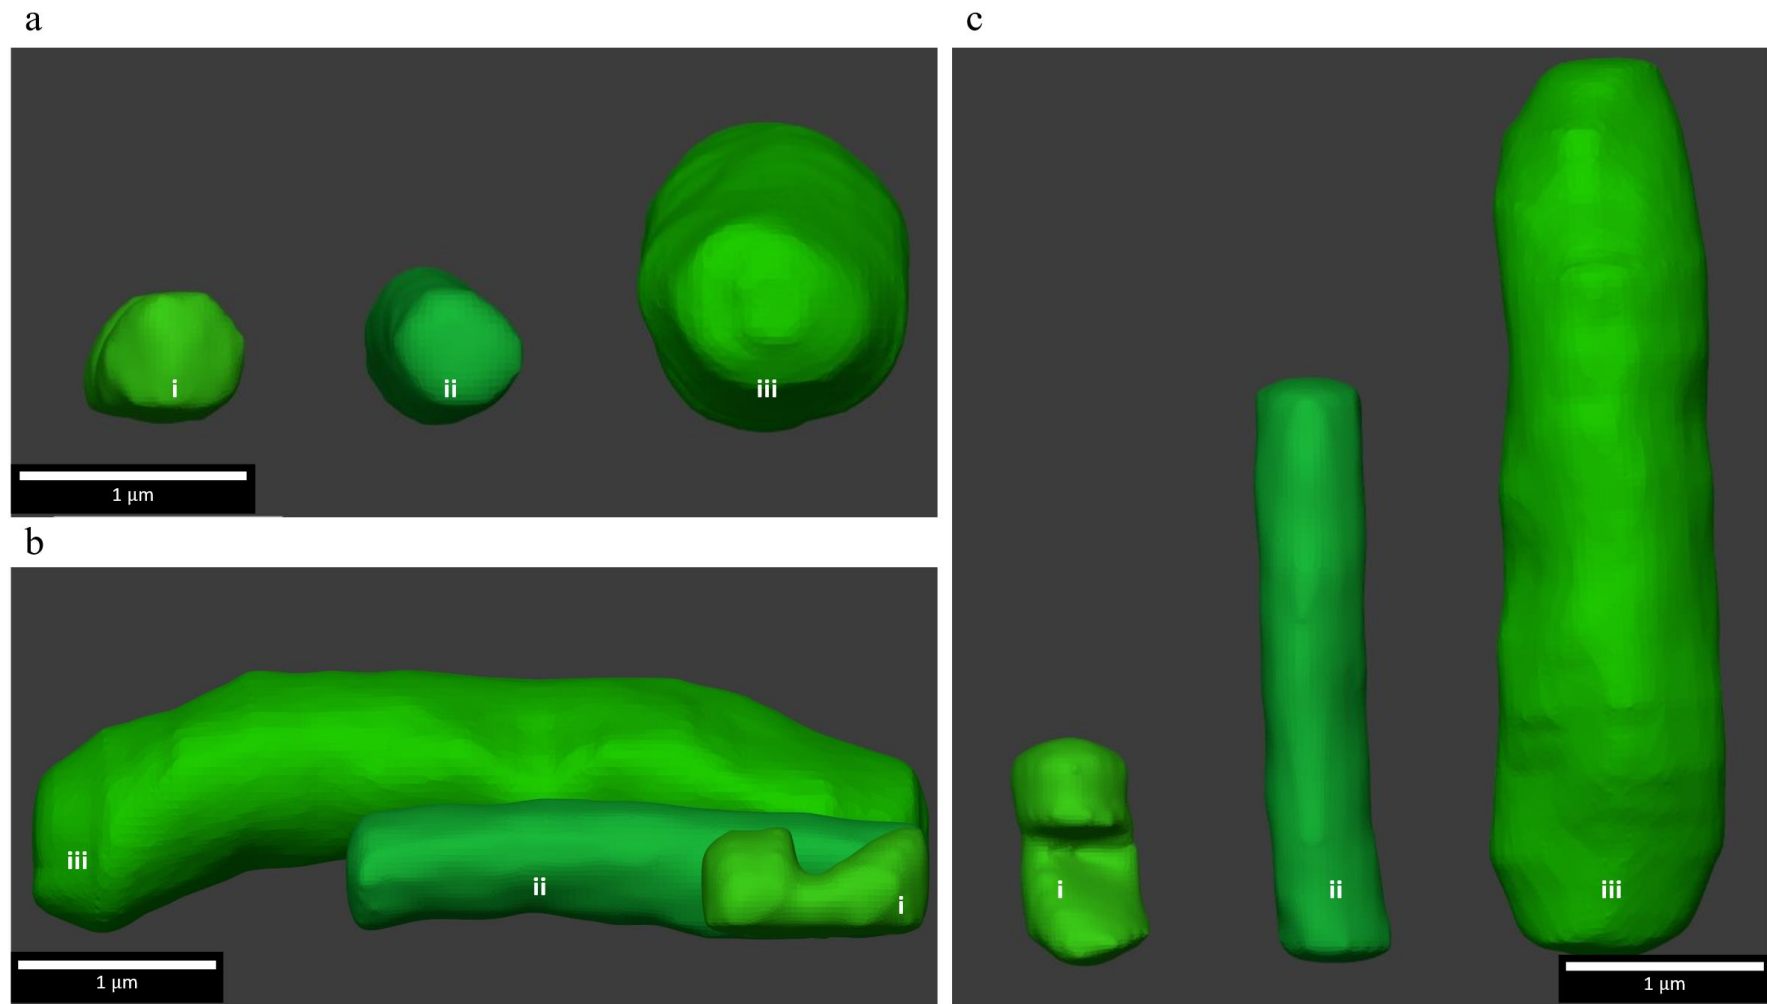

**Supplementary Figure 6. Size comparison of *E. coli* cells adhered to different nanostructured surfaces.** Size comparison of three different *E. coli* cells adhered on (i) PE-NS-Short surface, (ii) TO-NS-Short surface and (iii) TO-NS-Long surface. (a) Front view, (b) side view, (c) top view. Related to Figures 6-8.
